# Supplementary material for: Modulation of Circulating Cytokine-Chemokine Profile in Patients Affected by Chronic Venous Insufficiency Undergoing Surgical Hemodynamic Correction
Source: Hindawi journal article supplement (doi:10.1155/2014/473765), 2014-01-01
Supplement: f1 [file 473765.f1.pdf]

**SUPPLEMENTARY MATERIAL****Supplementary Table 1. Cytokines and growth factors analyzed by multiplex immunoassay**


---

|                                 |                                                                           |
|---------------------------------|---------------------------------------------------------------------------|
| <b>IL-1<math>\alpha</math></b>  | Interleukin 1, alpha                                                      |
| <b>IL-1<math>\beta</math></b>   | Interleukin 1, beta                                                       |
| <b>IL-1ra</b>                   | Interleukin-1 receptor antagonist                                         |
| <b>IL-2</b>                     | Interleukin 2, TCGF, lymphokine                                           |
| <b>IL-3</b>                     | Interleukin 3, colony-stimulating factor, MCGF; MULTI-CSF                 |
| <b>IL-4</b>                     | Interleukin 4, B cell growth factor 1                                     |
| <b>IL-5</b>                     | Interleukin 5, B-cell differentiation factor I; T-cell replacing factor   |
| <b>IL-6</b>                     | Interleukin 6, B-cell differentiation factor; B-cell stimulatory factor 2 |
| <b>IL-7</b>                     | Interleukin-7                                                             |
| <b>IL-8</b>                     | Interleukin 8, CXCL8, alveolar macrophage chemotactic factor I            |
| <b>IL-10</b>                    | Interleukin 10, T-cell growth inhibitory factor                           |
| <b>IL-12 (p40)</b>              | Interleukin-12 subunit p40,                                               |
| <b>IL-12 (p70)</b>              | Interleukin-12 subunit p70, CLMF, NKSF                                    |
| <b>IL-13</b>                    | Interleukin 13, ALRH, BHR1                                                |
| <b>IL-15</b>                    | Interleukin 15                                                            |
| <b>IL-17A</b>                   | Interleukin 17, CTLA-8; cytotoxic T-lymphocyte-associated antigen 8       |
| <b>EGF</b>                      | Epidermal growth factor                                                   |
| <b>Eotaxin</b>                  | C-C motif chemokine 11; eosinophil chemotactic protein                    |
| <b>G-CSF</b>                    | Granulocyte colony-stimulating factor                                     |
| <b>GM-CSF</b>                   | Granulocyte-Macrophage Colony Stimulating Factor                          |
| <b>IFN-<math>\alpha</math>2</b> | Interferon alpha 2                                                        |
| <b>IFN-<math>\gamma</math></b>  | Interferon gamma                                                          |
| <b>CXCL10</b>                   | IP10, 10 kDa interferon gamma-induced protein                             |
| <b>MCP-1</b>                    | CCL2, C-C motif chemokine 2; monocyte chemoattractant protein 1           |
| <b>MIP-1<math>\alpha</math></b> | CCL3, C-C motif chemokine 3; G0/G1 switch regulatory protein 19-1         |
| <b>PDGF</b>                     | Platelet derived growth factor                                            |
| <b>MIP-1<math>\beta</math></b>  | CCL4, C-C motif chemokine 4; CC chemokine ligand 4                        |
| <b>RANTES</b>                   | CCL5, C-C motif chemokine 5; SIS-delta                                    |
| <b>TNF-<math>\alpha</math></b>  | Tumor necrosis factor, alpha                                              |
| <b>TNF-<math>\beta</math></b>   | Tumor necrosis factor, beta                                               |
| <b>VEGF</b>                     | Vascular endothelial growth factor                                        |

---
